# Supplementary material for: Autoimmune glial fibrillary acidic protein astrocytopathy presented as ataxia, myoclonus and bulbar syndrome: a case report and review of the literature
Source: PubMed Central journal article supplement — BMJ Neurol Open. 2021 Oct 27;3(2):e000142. doi: 10.1136/bmjno-2021-000142 (PMC8552152; doi:10.1136/bmjno-2021-000142), 2021-10-27
Supplement: bmjno-2021-000142supp001.pdf [file bmjno-2021-000142supp001.pdf]

Supplementary images 1, 2, 3, 4, and 5. Up, from left to right, showing coronal T2 and FLAIR sequences of brainstem and cerebellum. Bottom, left side, showing sagittal FLAIR sequence of cerebellum and brainstem. Bottom, right side, showing cervical STIR sequence. None of the images show significant findings.
