# Supplementary material for: Autoimmune glial fibrillary acidic protein astrocytopathy presented as ataxia, myoclonus and bulbar syndrome: a case report and review of the literature
Source: PubMed Central journal article supplement — BMJ Neurol Open. 2021 Oct 27;3(2):e000142. doi: 10.1136/bmjno-2021-000142 (PMC8552152; doi:10.1136/bmjno-2021-000142), 2021-10-27
Supplement: bmjno-2021-000142supp003.pdf [file bmjno-2021-000142supp003.pdf]

Supplementary table 1. Literature of autoimmune GFAP astrocytopathy.

| Authors                     | Age range (years)  | Median age of onset (years) | Total number of patients (n) | Gender: number of patients (% of n)    | Number of patients with positive anti-GFAP antibodies in serum (% of n) | Number of patients with positive anti-GFAP antibodies in CSF (% of n) | Symptom/clinical syndrome: number of patients (% of n)                                                                                                                                                                                                                                                                                  | Treatments used: number of patients (% of n)                                                                                                                                                                                                                                                                                           | Outcomes: number of patients (% of n)                                                                                       |
|-----------------------------|--------------------|-----------------------------|------------------------------|----------------------------------------|-------------------------------------------------------------------------|-----------------------------------------------------------------------|-----------------------------------------------------------------------------------------------------------------------------------------------------------------------------------------------------------------------------------------------------------------------------------------------------------------------------------------|----------------------------------------------------------------------------------------------------------------------------------------------------------------------------------------------------------------------------------------------------------------------------------------------------------------------------------------|-----------------------------------------------------------------------------------------------------------------------------|
| Allen et al <sup>1</sup>    | 30-40 <sup>a</sup> | 30-40 <sup>a</sup>          | 1                            | (See Allen et al)                      | Not tested                                                              | 1 (100%)                                                              | Flaccid paralysis: 1 (100%)                                                                                                                                                                                                                                                                                                             | High dose corticosteroid treatment (acute).<br>Prednisone and mycophenolate (chronic).                                                                                                                                                                                                                                                 | At 6 months of onset, still in need of intermittent mechanical ventilation and help with all the activities of daily living |
| Fang et al <sup>2</sup>     | 21-73              | 43                          | 16                           | Male: 8 (50%)<br>Female: 8 (50%)       | 16 (100%)                                                               | 10 (62.5%)                                                            | Meningoencephalitis: 6 (37.5%)<br>Meningoencephalomyelitis: 5 (31.2%)<br>Encephalomyelitis: 2 (12.5%)<br>Encephalitis: 2 (12.5%)<br>Chronic meningitis: 1 (6.2%)                                                                                                                                                                        | High dose corticosteroid treatment (acute): 11 (68.75%)<br>Mycophenolate (chronic): 5 (31.2%)<br>Azathioprine (chronic): 1 (6.2%)<br>Unknown: 5 (31.2%)                                                                                                                                                                                | Relapse during corticosteroid dose tapering: 7 (43.7%)<br>No relapse: 6 (37.5%)<br>Unknown: 3 (31.2%)                       |
| Flanagan et al <sup>3</sup> | 8-103              | 44                          | 102                          | Male: 20 (52.7%)<br>Female: 18 (47.3%) | 102 (100%)                                                              | 64 (62.7%)                                                            | Encephalitis: 43 (42%)<br>Meningoencephalitis: 13 (12.5%)<br>Myelitis: 11 (10.5%)<br>Encephalomyelitis: 8 (8%)<br>Neuropathy: 8 (8%)<br>Meningitis: 5 (5%)<br>Ataxia: 5 (5%)<br>Meningoencephalomyelitis: 3 (3%)<br>Encephalopathy: 2 (2%)<br>Myasthenia gravis: 2 (2%)<br>Epilepsy: 1 (1%)<br>Dysautonomia: 1 (1%)<br>Dementia: 1 (1%) | High dose corticosteroid treatment (acute): 16 (42.1%) <sup>b</sup><br>Intravenous immunoglobulins (acute): 6 (15.7%) <sup>b</sup><br>Plasma exchange (acute): 3 (7.8%) <sup>b</sup><br>Mycophenolate (chronic): 5 (13.15%) <sup>b</sup><br>Azathioprin (chronic): 3 (7.8%) <sup>b</sup><br>Rituximab (chronic): 3 (7.8%) <sup>b</sup> | Unspecified clinical improvement: 18 (47.3%) <sup>b</sup><br>No improvement: 20 (52.7%) <sup>b</sup>                        |

| Authors                  | Age range (years)  | Median age of onset (years) | Total number of patients (n) | Gender: number of patients (% of n)   | Number of patients with positive anti-GFAP antibodies in serum (% of n) | Number of patients with positive anti-GFAP antibodies in CSF (% of n) | Symptom/clinical syndrome: number of patients (% of n)                                                                                                                                                                                                                                                                                                                                                          | Treatments used: number of patients (% of n)                                                                                                                                              | Outcomes: number of patients (% of n)                                                                                                                                            |
|--------------------------|--------------------|-----------------------------|------------------------------|---------------------------------------|-------------------------------------------------------------------------|-----------------------------------------------------------------------|-----------------------------------------------------------------------------------------------------------------------------------------------------------------------------------------------------------------------------------------------------------------------------------------------------------------------------------------------------------------------------------------------------------------|-------------------------------------------------------------------------------------------------------------------------------------------------------------------------------------------|----------------------------------------------------------------------------------------------------------------------------------------------------------------------------------|
| Iorio et al <sup>4</sup> | 6-80               | 56.5                        | 22                           | Male: 9 (0.40%)<br>Female: 13 (0.60%) | 22 (100%)                                                               | 8 (36.3%)                                                             | Seizures: 7 (31.8%)<br>Altered consciousness: 4 (18.1%)<br>Ataxia: 3 (13.6%)<br>Movement disorder: 2 (9%)<br>Paraparesis: 2 (9%)<br>Behaviour disturbance: 2 (9%).<br>Tetraparesis: 2 (9%)<br>Paraplegia: 1 (4%)<br>Psychosis: 1 (4%)<br>Headache: 1 (4%)<br>Rigor: 1 (4%)<br>Dyskinesias: 1 (4%)<br>Sensory loss: 1 (4%)<br>Sphincter dysfunction: 1 (4%)<br>Blurred vision: 1 (4%)<br>Bulbar syndrome: 1 (4%) | Intravenous methylprednisolone (acute): 15 (68.1%)<br>Intravenous immunoglobulins (acute): 2 (9%)<br>Oral corticosteroid treatment (acute): 1 (4.5%)<br>Plasma exchange (acute): 1 (4.5%) | Unspecified clinical improvement: 16 (72.7%)<br>(Pretreatment mean mRss: 3.26 (95% CI 2.78 to 3.74); last follow-up mRss: 1.47 (95% CI 0.82 to 2.12); p=0.0001)<br>Death: 2 (9%) |
| Ip et al <sup>5</sup>    | 40-50 <sup>a</sup> | 40-50 <sup>a</sup>          | 1                            | (See Ip et al)                        | 1                                                                       | 1                                                                     | Meningoencephalitis and bilateral sensorineural deafness: 1 (100%)                                                                                                                                                                                                                                                                                                                                              | Intravenous immunoglobulin, intravenous methylprednisolone, and plasma exchange (acute).<br>Rituximab (chronic)                                                                           | Treatment improved hearing and upper limb power.<br>Successful weaning of tracheostomy and nasogastric feeding.<br>Walking with little assistance.                               |
| Lee et al <sup>6</sup>   | 70-80 <sup>a</sup> | 70-80 <sup>a</sup>          | 1                            | (See Lee et al)                       | Not tested                                                              | 1                                                                     | Rigidity, bradykinesia, arm myoclonus and hyperreflexia: 1 (100%)                                                                                                                                                                                                                                                                                                                                               | Intravenous methylprednisolone (acute).                                                                                                                                                   | Promptly and unspecified response to methylprednisolone                                                                                                                          |

| Authors                 | Age range (years) | Median age of onset (years) | Total number of patients (n) | Gender: number of patients (% of n)   | Number of patients with positive anti-GFAP antibodies in serum (% of n) | Number of patients with positive anti-GFAP antibodies in CSF (% of n) | Symptom/clinical syndrome: number of patients (% of n)                                                                                                                                                                                                                                                                  | Treatments used: number of patients (% of n)                                                                                                                                                                                                      | Outcomes: number of patients (% of n)                                                |
|-------------------------|-------------------|-----------------------------|------------------------------|---------------------------------------|-------------------------------------------------------------------------|-----------------------------------------------------------------------|-------------------------------------------------------------------------------------------------------------------------------------------------------------------------------------------------------------------------------------------------------------------------------------------------------------------------|---------------------------------------------------------------------------------------------------------------------------------------------------------------------------------------------------------------------------------------------------|--------------------------------------------------------------------------------------|
| Long et al <sup>7</sup> | 23-73             | 54                          | 19                           | Male: 6 (31.5%)<br>Female: 13 (68.5%) | Not tested                                                              | 19                                                                    | Myelitis: 13 (68.4%)<br>Headache: 12 (63.2%)<br>Abnormal vision: 12 (63.2%)<br>Fever: 10 (52.6%)<br>Ataxia: 7 (36.8%)<br>Psychosis: 6 (31.6%)<br>Dyskinesia: 3 (15.8%)<br>Dementia: 3 (15.8%)<br>Seizures: 2 (10.5%)<br>Coma: 1 (5.3%)<br>SIADH: 1 (5.3%)<br>Hiccup and nausea: 1 (5.3%)<br>Sever vision loss: 1 (5.3%) | Intravenous methylprednisolone (acute): 18 (94.7%)<br>Intravenous immunoglobulins (acute): 11 (57.8%)<br>Oral methylprednisolone (chronic): 16 (84.2%)<br>Mycophenolate (chronic): 2 (10.5%)<br>Azathioprine (chronic): 2 (10.5%)                 | Not described                                                                        |
| Yang et al <sup>8</sup> | 27-69             | 56                          | 7                            | Male: 3 (42.8%)<br>Female: 4 (57.2%)  | Not tested                                                              | 7                                                                     | Headache: 6 (85%)<br>Ataxia: 6 (85%)<br>Dyskinesia: 6 (85%)<br>Dementia: 6 (85%)<br>Coma: 6 (85%)<br>Abnormal vision: 3 (42%)<br>Longitudinally extensive transverse myelitis: 3 (42%)                                                                                                                                  | Intravenous methylprednisolone (acute): 7 (100%)<br>Intravenous immunoglobulins (acute): 6 (85.7%)<br>Plasma exchange and mycophenolate (acute): 1 (14.2%)<br>Mycophenolate (chronic stage): 2 (28.5%)<br>Azathioprine (chronic stage): 2 (28.5%) | Unspecified good outcome: 1 (14.2%)<br>Poor prognosis: 6 (85.8%)<br>Death: 2 (28.5%) |

<sup>a</sup>Exact data available in the original articles.

<sup>b</sup>% of n calculated for 38 patients which have available data.

## **BIBLIOGRAPHY**

1. Allen A, Gulhar S, Haidari R, Martinez JPP, Bekenstein J, DeLorenzo R, Tang Y, Oh U. Autoimmune glial fibrillary acidic protein astrocytopathy resulting in treatment-refractory flaccid paralysis. *Mult Scler Relat Disord*. 2020;3;39:101924. [PMID: 31927153. DOI: 10.1016/j.msard.2019.101924]
2. Fang B, McKeon A, Hinson SR, Kryzer TJ, Pittcock SJ, Aksamit AJ, Lennon VA. Autoimmune glial fibrillary acidic protein astrocytopathy: a novel meningoencephalomyelitis. *JAMA Neurol*. 2016;73(11):1297-1307. [PMID: 27618707. DOI: 10.1001/jamaneurol.2016.2549]
3. Flanagan EP, Hinson SR, Lennon VA, Fang B, Aksamit AJ, Morris PP, Basal E, Honorat JA, Alfugham NB, Linnoila JJ, Weinshenker BG, Pittcock SJ, McKeon A. Glial fibrillary acidic protein immunoglobulin G as biomarker of autoimmune astrocytopathy: Analysis of 102 patients. *Ann Neurol*. 2017 Feb;81(2):298-309. [PMID: 28120349. DOI: 10.1002/ana.24881]
4. Iorio R, Damato V, Evoli A, Gessi M, Gaudino S, Di Lazzaro V, Spagni G, Sluijs JA, Hol EM. Clinical and immunological characteristics of the spectrum of GFAP autoimmunity: a case series of 22 patients. *J Neurol Neurosurg Psychiatry*. 2018;89(2):138-146. [PMID: 28951498. DOI: 10.1136/jnnp-2017-316583]
5. Ip B, Lam C, Ip V, Chan A, Mok V, Au E, Chan E, Lau A. Autoimmune glial fibrillary acidic protein astrocytopathy associated meningoencephalomyelitis and bilateral sensorineuronal deafness. *Mult Scler Relat Disord*. 2020;40: 101922. [PMID: 31981881. DOI: 10.1016/j.msard.2019.101922]
6. Lee PKJ, Small JE, Vytopil M. Teaching NeuroImages: Autoimmune glial fibrillary acidic protein meningoencephalomyelitis. *Neurology*. 2019;93(22):e2076-e2077. [PMID: 31767668. DOI: 10.1212/WNL.0000000000008562]
7. Long Y, Liang J, Xu H, Huang Q, Yang J, Gao C, Qiu W, Lin S, Chen X. Autoimmune glial fibrillary acidic protein astrocytopathy in Chinese patients: a retrospective study. *Eur J Neurol*. 2018;25(3):477-483. [PMID: 29193473. DOI: 10.1111/ene.13531]
8. Yang X, Liang J, Huang Q, Xu H, Gao C, Long Y, Xiao X. Treatment of autoimmune glial fibrillary acidic protein astrocytopathy: follow-up in 7 cases. *Neuroimmunomodulation*. 2017;24(2):113-119. [PMID: 28922662. DOI: 10.1159/000479948]
