# Supplementary figures and images for: Autoimmune glial fibrillary acidic protein astrocytopathy presented as ataxia, myoclonus and bulbar syndrome: a case report and review of the literature
Source: PubMed Central journal article supplement — BMJ Neurol Open. 2021 Oct 27;3(2):e000142. doi: 10.1136/bmjno-2021-000142 (PMC8552152; doi:10.1136/bmjno-2021-000142), 2021-10-27

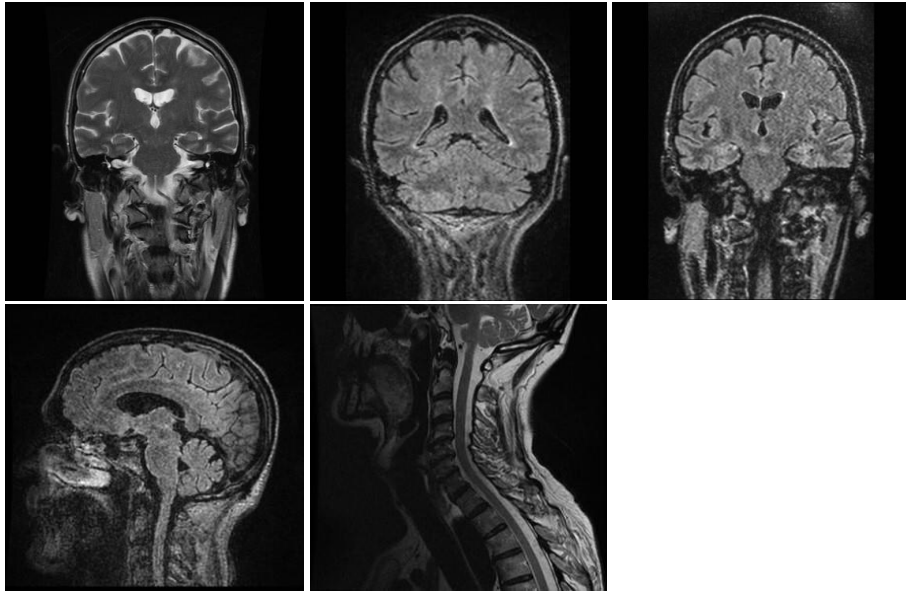

Supplement: bmjno-2021-000142supp002.pdf [file bmjno-2021-000142supp002.pdf]
